# Supplementary material for: The 2NS Translocation from Aegilops ventricosa Confers Resistance to the Triticum Pathotype of Magnaporthe oryzae
Source: PubMed Central journal article supplement — Crop Sci. Author manuscript; Available in PMC 2016 Oct 31. (PMC5087972; doi:10.2135/cropsci2015.07.0410), 2016-03-23
Supplement: NIHMS825306-supplement-Sup__Table.pdf [file NIHMS825306-supplement-Sup__Table.pdf]

Supplemental Table S1. Disease severity ratings of 74 U.S. winter and spring wheat cultivars, and Near Isogenic Lines (NILs) to wheat blast isolate T-25. All entries possessed the *Ae. ventricosa* 2NS/2AS translocation.

| <b>No.</b> | <b>Wheat Entry</b> | <b>Type</b> | <b>Head Blast severity<sup>a</sup></b> |
|------------|--------------------|-------------|----------------------------------------|
| 1          | OK03305            | Winter      | 0.0                                    |
| 2          | KS020822-M-5       | Winter      | 0.0                                    |
| 3          | WA008123           | Spring      | 0.0                                    |
| 4          | UC1617             | Spring      | 0.0                                    |
| 5          | Express 2NS        | NIL         | 0.0                                    |
| 6          | Yecora Rojo 2NS    | NIL         | 0.0                                    |
| 7          | Art                | Winter      | 0.1                                    |
| 8          | UC1041 2NS         | NIL         | 0.4                                    |
| 9          | GA011493-8E18      | Winter      | 0.4                                    |
| 10         | Santa Fe           | Winter      | 1.0                                    |
| 11         | OR4071004          | Spring      | 1.1                                    |
| 12         | Jagger             | Winter      | 1.3                                    |
| 13         | Jagalene           | Winter      | 1.3                                    |
| 14         | SY Gold            | Winter      | 1.4                                    |
| 15         | Overley            | Winter      | 1.5                                    |
| 16         | Protection CL      | Winter      | 1.6                                    |
| 17         | HV9W03-539R        | Winter      | 1.7                                    |
| 18         | Jackpot            | Winter      | 1.7                                    |
| 19         | Smokey Hill        | Winter      | 1.8                                    |
| 20         | Shocker            | Winter      | 2.0                                    |
| 21         | Postrock           | Winter      | 2.4                                    |
| 22         | Danby              | Winter      | 2.8                                    |
| 23         | CO06W096           | Winter      | 3.1                                    |
| 24         | ARS970163-4C       | Winter      | 3.4                                    |
| 25         | Hawken             | Winter      | 3.8                                    |
| 26         | GA00067-8E35       | Winter      | 3.9                                    |
| 27         | Kern 2NS           | NIL         | 4.0                                    |
| 28         | A01110D-208-5-C    | Winter      | 4.0                                    |
| 29         | UC1618             | Spring      | 4.1                                    |
| 30         | NuDakota           | Winter      | 4.2                                    |
| 31         | Greer              | Winter      | 4.8                                    |
| 32         | CJ                 | Winter      | 4.9                                    |
| 33         | GA99-1371-6E12     | Winter      | 5.1                                    |
| 34         | Stout              | Winter      | 5.3                                    |
| 35         | OK Bullet          | Winter      | 5.4                                    |
| 36         | OK04525            | Winter      | 6.0                                    |
| 37         | Anza 2NS           | NIL         | 6.2                                    |
| 38         | UC 1037 2NS        | NIL         | 7.1                                    |
| 39         | KS020638-5-1       | Winter      | 7.1                                    |

|    |                   |        |       |
|----|-------------------|--------|-------|
| 40 | AP06T A4520       | Winter | 7.6   |
| 41 | Ripper            | Winter | 8.3   |
| 42 | TX04V075080       | Winter | 8.7   |
| 43 | T-136             | Winter | 9.1   |
| 44 | KS020319-7-2      | Winter | 9.5   |
| 45 | Keota             | Winter | 11.9  |
| 46 | Trego             | Winter | 12.7  |
| 47 | CA9W07-819        | Winter | 14.9  |
| 48 | Fuller            | Winter | 17.5  |
| 49 | T166              | Winter | 19.8  |
| 50 | HV9W03-696R-2     | Winter | 21.3  |
| 51 | OK06336           | Winter | 22.0  |
| 52 | CO04W320-1        | Winter | 25.4  |
| 53 | Heyne             | Winter | 26.8  |
| 54 | NX04Y2107         | Winter | 27.3  |
| 55 | PATWIN            | Spring | 29.2  |
| 56 | OKO5212           | Winter | 31.9  |
| 57 | SD07165           | Winter | 34.6  |
| 58 | SD05118-1         | Winter | 38.0  |
| 59 | KS970093-8-9-#1-1 | Winter | 39.4  |
| 60 | Hitch             | Winter | 40.8  |
| 61 | NE05496           | Winter | 41.3  |
| 62 | Kharkof           | Winter | 41.6  |
| 63 | CO06W153          | Winter | 44.4  |
| 64 | CO06041           | Winter | 46.2  |
| 65 | Blanca Royale     | Winter | 46.8  |
| 66 | ARS03174CS-14     | Spring | 51.5  |
| 67 | TAM-107           | Winter | 58.2  |
| 68 | OR4081232         | Spring | 65.1  |
| 69 | Summit            | Winter | 66.7  |
| 70 | 2137              | Winter | 71.3  |
| 71 | TX07A001305       | Winter | 75.3  |
| 72 | NI08708           | Winter | 85.5  |
| 73 | Mace              | Winter | 98.1  |
| 74 | NWD4Y2188         | Winter | 100.0 |

<sup>a</sup> Percent of wheat spikelets affected by isolate T-25

Supplemental Table S2. Disease severity ratings of 169 U.S. winter cultivars to wheat blast isolate T-25. No entry possessed the *Ae. ventricosa* 2NS/2AS translocation.

| No. | Wheat Entry    | Head Blast severity <sup>a</sup> |
|-----|----------------|----------------------------------|
| 1   | CO050173       | 0.00                             |
| 2   | NE04490        | 0.00                             |
| 3   | CO06M242       | 0.00                             |
| 4   | CO06531        | 0.00                             |
| 5   | RonL           | 0.05                             |
| 6   | TAM 112        | 0.1                              |
| 7   | Jackpot        | 0.52                             |
| 8   | Hatcher        | 0.6                              |
| 9   | TAM 110        | 0.9                              |
| 10  | GA-981621-5E34 | 0.93                             |
| 11  | GA001138-8E37  | 1.11                             |
| 12  | 2609           | 1.12                             |
| 13  | ARS05-1044     | 1.25                             |
| 14  | Overland       | 1.46                             |
| 15  | BC97ROM-50W    | 1.56                             |
| 16  | ARS05-0443     | 1.78                             |
| 17  | OR2070136H     | 2.31                             |
| 18  | KS05HW136-3    | 2.39                             |
| 19  | KSO6HW46-3     | 3.32                             |
| 20  | Avaanche       | 3.41                             |
| 21  | CO050173       | 3.61                             |
| 22  | SD07W053       | 3.73                             |
| 23  | TX05A001828    | 4.83                             |
| 24  | CO050337-2     | 5.83                             |
| 25  | NE05549        | 6.67                             |
| 26  | KS08HW35-1     | 7.04                             |
| 27  | Tiger          | 7.41                             |
| 28  | CO050303-2     | 8.32                             |
| 29  | ARS03-5358     | 8.62                             |
| 30  | Fuller         | 9.18                             |
| 31  | TAM 111        | 9.3                              |
| 32  | KS0603A-57-1   | 9.33                             |
| 33  | CO06534        | 9.72                             |
| 34  | ARS05-0286     | 9.73                             |
| 35  | Infinity CL    | 9.75                             |
| 36  | NEO5496        | 9.76                             |
| 37  | ARS05-0404     | 10.00                            |
| 38  | ARS05-1041     | 10.00                            |
| 39  | TX06V7266      | 10.00                            |

|    |                     |       |
|----|---------------------|-------|
| 40 | GA991209-6E33       | 10.21 |
| 41 | T-154               | 11.16 |
| 42 | NX05MD4180-6        | 11.48 |
| 43 | OKO5128 .           | 11.70 |
| 44 | NE05548             | 11.71 |
| 45 | Truman              | 11.88 |
| 46 | 25R47               | 12.13 |
| 47 | CO050175-1          | 12.55 |
| 48 | Endurance           | 13.02 |
| 49 | SD05W030            | 13.16 |
| 50 | 25R78               | 13.24 |
| 51 | Millennium          | 13.25 |
| 52 | NW07505             | 13.50 |
| 53 | WB-Cedar            | 13.83 |
| 54 | HV9W96-1383R        | 14.16 |
| 55 | CA9WO7-817          | 14.25 |
| 56 | Tomahawk            | 14.26 |
| 57 | CO05066-1           | 14.36 |
| 58 | 25R62               | 16.79 |
| 59 | McGill              | 16.87 |
| 60 | GA011124-8E32       | 18.75 |
| 61 | Robidoux            | 19.32 |
| 62 | GA021282-8A2        | 20.00 |
| 63 | TX05V7259           | 22.03 |
| 64 | Centerfield         | 24.83 |
| 65 | Camelot             | 25.57 |
| 66 | NC06-20401          | 26.23 |
| 67 | SD07W084            | 27.64 |
| 68 | TX03A0563-07AZHR247 | 27.90 |
| 69 | NC05-20671          | 28.50 |
| 70 | T181                | 28.50 |
| 71 | NE06469             | 28.64 |
| 72 | Settler CL          | 29.05 |
| 73 | CO050337-2          | 30.00 |
| 74 | SD08028             | 30.67 |
| 75 | TX06A001263         | 30.80 |
| 76 | 9553                | 31.44 |
| 77 | TAM 304             | 31.55 |
| 78 | TAM 107             | 31.93 |
| 79 | NE06545             | 32.20 |
| 80 | OK07218             | 32.41 |
| 81 | 2525                | 32.67 |
| 82 | CO06530             | 33.33 |
| 83 | KS020319-7-3        | 34.56 |
| 84 | T150-1              | 35.47 |

|     |                |       |
|-----|----------------|-------|
| 85  | TX07A001505    | 35.60 |
| 86  | Triumph 64     | 35.8  |
| 87  | T165           | 37.14 |
| 88  | Aspen          | 37.42 |
| 89  | CO06059        | 37.47 |
| 90  | NI04420        | 37.50 |
| 91  | CO06052        | 37.86 |
| 92  | Trego          | 38    |
| 93  | T-140          | 39.02 |
| 94  | T-151          | 40.1  |
| 95  | SCT98-5B1      | 40.91 |
| 96  | TAM 105        | 41.08 |
| 97  | NE07487        | 41.61 |
| 98  | T164           | 42.71 |
| 99  | Armour         | 42.94 |
| 100 | Antelope       | 44.72 |
| 101 | T-81           | 45.73 |
| 102 | Ca Rojo        | 45.98 |
| 103 | CO05W194       | 47.07 |
| 104 | Above CL       | 47.15 |
| 105 | SD08080        | 47.19 |
| 106 | Scout 66       | 47.63 |
| 107 | Hondo          | 47.81 |
| 108 | CO06424        | 50    |
| 109 | AR98088-1-2    | 50.00 |
| 110 | SD06W160-2     | 50.00 |
| 111 | KSO5HW136-3    | 52.41 |
| 112 | CO050270-1     | 52.71 |
| 113 | CO050322       | 52.92 |
| 114 | Trica Brand 96 | 56.00 |
| 115 | CO03064-2      | 56.33 |
| 116 | Anton          | 56.85 |
| 117 | Billings       | 58.29 |
| 118 | Duster         | 58.67 |
| 119 | Ike            | 58.75 |
| 120 | OK07209        | 58.84 |
| 121 | Blanca Fuerte  | 59.41 |
| 122 | NE07531        | 61.13 |
| 123 | AR99138-7-1    | 61.80 |
| 124 | GA02264-8LE17  | 62.00 |
| 125 | SD06158        | 62.50 |
| 126 | CO06107        | 62.75 |
| 127 | CO06542        | 62.97 |
| 128 | CO06052        | 64.44 |
| 129 | AR99015-2-1    | 64.44 |

|     |             |        |
|-----|-------------|--------|
| 130 | T179        | 66.67  |
| 131 | SD05085-1   | 67.04  |
| 132 | Lariat      | 67.30  |
| 133 | CO06424     | 67.93  |
| 134 | WGRC 46     | 68.67  |
| 135 | CO05W111    | 69.33  |
| 136 | Oakes       | 69.48  |
| 137 | Lance       | 70.86  |
| 138 | BO30543     | 73.24  |
| 139 | CO050233-2  | 73.24  |
| 140 | TX05A001188 | 74.25  |
| 141 | NC05-22804  | 75.00  |
| 142 | CO06072     | 75.82  |
| 143 | NE06607     | 77.90  |
| 144 | T180        | 79.57  |
| 145 | TX06A001281 | 80.28  |
| 146 | OK07231     | 80.36  |
| 147 | AR99009-3-2 | 80.89  |
| 148 | NE06430     | 82.71  |
| 149 | ARS03-4736  | 83.75  |
| 150 | OK08328     | 85.36  |
| 151 | NI07703     | 85.42  |
| 152 | USG3555 CK  | 85.71  |
| 153 | NE07627     | 86.82  |
| 154 | Cameot      | 88.00  |
| 155 | NE07444     | 88.00  |
| 156 | Fortissimo  | 88.26  |
| 157 | 00WV50059   | 88.46  |
| 158 | SCAR99103N1 | 89.17  |
| 159 | OK07214     | 89.17  |
| 160 | KS970093    | 90.33  |
| 161 | Wesley      | 93.72  |
| 162 | Winterhawk  | 94.23  |
| 163 | NE07520     | 94.36  |
| 164 | Karl 92     | 94.52  |
| 165 | Everest     | 95.1   |
| 166 | Voante      | 96.56  |
| 167 | Redwing     | 100.00 |
| 168 | AR99174-5-1 | 100.00 |
| 169 | NX04Y2107   | 100.00 |

<sup>a</sup> Percent of wheat spikelets affected by isolate T-25

Supplemental Table S3. Disease severity ratings of 175 U.S. spring cultivars to wheat blast isolate T-25. No entry possessed the *Ae. ventricosa* 2NS/2AS translocation.

| No. | Wheat Entry <sup>a</sup> | Head Blast severity <sup>b</sup> |
|-----|--------------------------|----------------------------------|
| 1   | Sunco                    | 0.00                             |
| 2   | LASSIK                   | 0.00                             |
| 3   | 01S0263-28               | 9.38                             |
| 4   | NICK                     | 15.40                            |
| 5   | BR7030                   | 16.00                            |
| 6   | Klasic                   | 19.50                            |
| 7   | OR4031138                | 24.65                            |
| 8   | OR4051259                | 25.71                            |
| 9   | WA008100                 | 26.07                            |
| 10  | Snowcrest                | 27.05                            |
| 11  | BUCK PRONTO              | 31.41                            |
| 12  | WA008074                 | 32.95                            |
| 13  | 00S0211-29-4             | 33.15                            |
| 14  | 01S0263-29               | 34.90                            |
| 15  | WB-FUZION                | 36.15                            |
| 16  | NDSW0217*                | 37.42                            |
| 17  | Jerome                   | 38.25                            |
| 18  | SD3746                   | 39.43                            |
| 19  | TARA 2002                | 39.95                            |
| 20  | MN02252-A                | 40.71                            |
| 21  | BW362                    | 42.48                            |
| 22  | ND 800                   | 44.29                            |
| 23  | OR4990114                | 46.15                            |
| 24  | OR4041268                | 47.17                            |
| 25  | OR4081276                | 48.47                            |
| 26  | 2-49                     | 50.90                            |
| 27  | BW396                    | 51.50                            |
| 28  | WA008122                 | 51.50                            |
| 29  | UC 1037 <sup>a</sup>     | 51.69                            |
| 30  | BW342                    | 52.00                            |
| 31  | WHIT                     | 52.25                            |
| 32  | MACON                    | 52.70                            |
| 33  | ND 741                   | 52.77                            |
| 34  | OR4031177                | 53.00                            |
| 35  | SD3943                   | 53.75                            |
| 36  | OTIS                     | 53.80                            |
| 37  | Pristine                 | 53.85                            |
| 38  | Yecora Rojo <sup>a</sup> | 55.00                            |
| 39  | 00S0292-14               | 55.25                            |
| 40  | WAKANZ                   | 55.55                            |

|    |                      |       |
|----|----------------------|-------|
| 41 | SD4036               | 55.58 |
| 42 | ND04/3-20            | 56.82 |
| 43 | ND03/1-13            | 56.96 |
| 44 | 01S0042-10           | 57.00 |
| 45 | ND04/3-21            | 57.55 |
| 46 | ND04/3-18            | 58.25 |
| 47 | 01S0377-6            | 58.95 |
| 48 | BW357                | 59.14 |
| 49 | SCARLET              | 59.16 |
| 50 | Keene                | 59.28 |
| 51 | BW379                | 59.63 |
| 52 | ES101                | 60.42 |
| 53 | MN02255              | 60.93 |
| 54 | ND05/1-1             | 61.91 |
| 55 | KELSE                | 62.10 |
| 56 | PT436                | 62.76 |
| 57 | 98S0051-1-14         | 63.95 |
| 58 | SD3944               | 64.34 |
| 59 | ND04/3-19            | 66.09 |
| 60 | BULLSEYE             | 67.05 |
| 61 | OR4042011            | 67.13 |
| 62 | OUYEN                | 68.05 |
| 63 | Pomerelle            | 68.45 |
| 64 | ND05/1-3             | 68.53 |
| 65 | ES95                 | 68.71 |
| 66 | OR4042009            | 68.73 |
| 67 | ARS03171LS-12        | 69.94 |
| 68 | CHRIS                | 70.08 |
| 69 | NDSW0601             | 70.79 |
| 70 | Centennial           | 71.00 |
| 71 | NDSW0430             | 72.77 |
| 72 | EDEN                 | 73.26 |
| 73 | SD4024               | 73.50 |
| 74 | Anza <sup>a</sup>    | 74.22 |
| 75 | MN99436-6            | 74.30 |
| 76 | UC 1041 <sup>a</sup> | 75.29 |
| 77 | Kern <sup>a</sup>    | 75.30 |
| 78 | 97S0254-8-1          | 75.66 |
| 79 | MARQUIS              | 75.86 |
| 80 | IDO599               | 76.00 |
| 81 | MN03306-1            | 76.04 |
| 82 | HOLLIS               | 76.25 |
| 83 | 98S0113-20-23        | 76.50 |
| 84 | Express <sup>a</sup> | 76.52 |
| 85 | SD3668               | 76.72 |



|     |            |       |
|-----|------------|-------|
| 86  | ARS03415LS | 76.79 |
| 87  | ND05/1-2   | 77.04 |
| 88  | 2375       | 77.05 |
| 89  | BW415      | 78.30 |
| 90  | MN03196    | 78.46 |
| 91  | OR4061191  | 78.80 |
| 92  | MN01197    | 78.82 |
| 93  | BW361      | 78.95 |
| 94  | ALPOWA     | 79.04 |
| 95  | ND 801     | 79.25 |
| 96  | SD3851     | 79.43 |
| 97  | AVOCET     | 80.25 |
| 98  | 00S0291-3  | 80.26 |
| 99  | EXPRESS    | 80.32 |
| 100 | Owens      | 80.35 |
| 101 | Twin       | 80.35 |
| 102 | MN03308-4  | 80.76 |
| 103 | SD3942     | 80.81 |
| 104 | WA008106   | 80.90 |
| 105 | JEFFERSON  | 80.91 |
| 106 | UC1602     | 81.13 |
| 107 | 98S0113-20 | 81.84 |
| 108 | UI Lochsa  | 81.86 |
| 109 | Whitebird  | 82.00 |
| 110 | BW430      | 82.42 |
| 111 | SD3687     | 82.50 |
| 112 | SD4073     | 82.52 |
| 113 | Leona      | 82.70 |
| 114 | Fielder    | 82.87 |
| 115 | 99S0362-21 | 82.95 |
| 116 | NDSW0350   | 83.08 |
| 117 | OR4081216  | 83.43 |
| 118 | SD3948     | 83.48 |
| 119 | BW367      | 83.81 |
| 120 | MN01311-A  | 84.12 |
| 121 | UI Pettit  | 84.15 |
| 122 | NDSW0345*  | 84.45 |
| 123 | NDSW0501   | 84.78 |
| 124 | JD         | 84.86 |
| 125 | OR4071017  | 85.07 |
| 126 | 99S0006-2  | 85.24 |
| 127 | ND 751     | 85.84 |
| 128 | Lolo       | 86.15 |
| 129 | BW364      | 86.27 |
| 130 | SD3618     | 86.45 |

|     |               |        |
|-----|---------------|--------|
| 131 | UI WINCHESTER | 87.14  |
| 132 | DAHRWAR DRY   | 88.42  |
| 133 | OR4071122     | 88.50  |
| 134 | 98S0051-1     | 88.79  |
| 135 | 96S0404-03    | 88.91  |
| 136 | ALTURAS       | 89.05  |
| 137 | 00H04*J3      | 89.39  |
| 138 | OR4041433     | 89.58  |
| 139 | Idaho 377s    | 89.88  |
| 140 | WA008124      | 90.20  |
| 141 | WPB 936       | 90.40  |
| 142 | LOUISE        | 90.40  |
| 143 | UI Cataldo    | 90.41  |
| 144 | SD4027        | 90.45  |
| 145 | SD3956        | 90.52  |
| 146 | MN00261-4     | 90.53  |
| 147 | MN03358-4     | 90.70  |
| 148 | ND 747        | 90.85  |
| 149 | SD3868        | 90.95  |
| 150 | NDSW0481*     | 90.96  |
| 151 | NDSW0449      | 92.00  |
| 152 | Glenn         | 92.04  |
| 153 | MN03119-4     | 92.19  |
| 154 | MN01333-A     | 92.28  |
| 155 | N99-0241      | 92.28  |
| 156 | ZAK           | 92.86  |
| 157 | Fieldwin      | 93.15  |
| 158 | 98S0127-06    | 93.31  |
| 159 | SD3854        | 93.83  |
| 160 | NDSW0347      | 94.19  |
| 161 | MN02072-7     | 94.29  |
| 162 | MN03169-2-062 | 94.52  |
| 163 | SD4001        | 94.57  |
| 164 | 99S0051-3-1   | 94.63  |
| 165 | Sterling      | 95.60  |
| 166 | WA008105      | 95.80  |
| 167 | NDSW0348      | 96.12  |
| 168 | MN05141-2     | 96.15  |
| 169 | SD3870        | 96.36  |
| 170 | Jubilee       | 97.30  |
| 171 | SD3635        | 98.09  |
| 172 | BABE          | 98.30  |
| 173 | WA008090      | 98.71  |
| 174 | PENAWAWA      | 100.00 |
| 175 | ARS03173LS-10 | 100.00 |

<sup>a</sup> Entries correspond to parents of Near Isogenic Lines (NILs) UC1037-2NS, Yecora Rojo-2NS, Anza-2NS, UC1041-2NS, Kern-2NS, and Express-2NS

<sup>b</sup> Percent of wheat spikelets affected by isolate T-25
